# Supplementary material for: Preparation of a boronic acid functionalized magnetic adsorbent for sensitive analysis of fluoroquinolones in environmental water samples
Source: Royal Society of Chemistry journal article supplement (doi:10.1039/c6ay00903d), 2016-01-01
Supplement: c6ay00903d1.pdf [file c6ay00903d1.pdf]

*Supporting information*

**Preparation of boronic acid functionalized magnetic adsorbent for  
sensitive analysis of fluoroquinolones in environmental water  
samples**

Chen Liu<sup>1</sup>, Yingmin Liao<sup>2</sup>, Xiaojia Huang<sup>1\*</sup>

1. *State Key Laboratory of Marine Environmental Science, Key Laboratory of the Ministry of Education for Coastal and Wetland Ecosystem, College of the Environment and Ecology, Xiamen University, Xiamen 361005, China*
2. *Department of Environmental Science & Engineering, Tan Kah Kee College, Zhangzhou 363105, China*

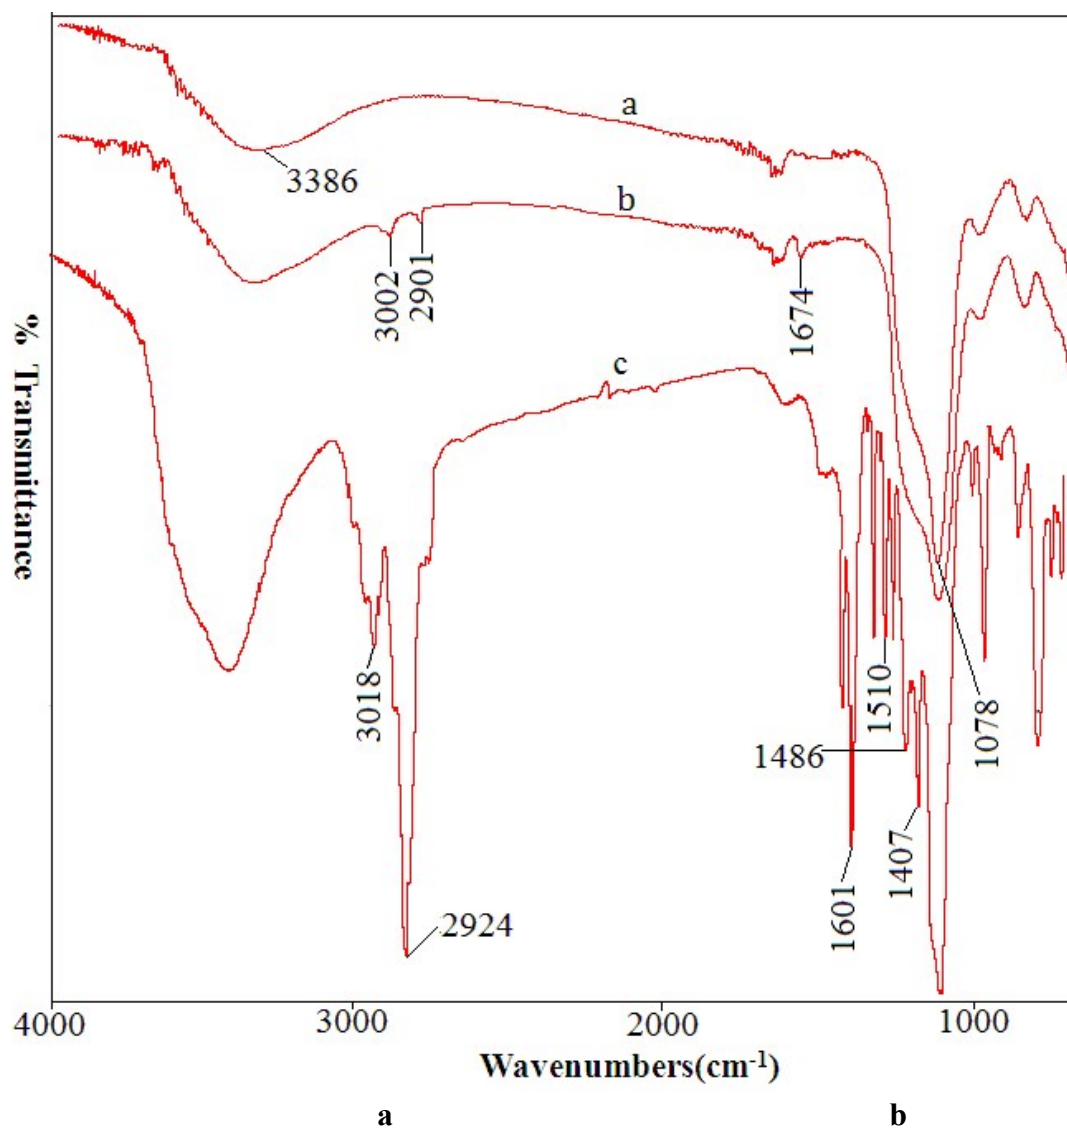

**Fig.S1.** FT-IR spectra of Fe<sub>3</sub>O<sub>4</sub>@SiO<sub>2</sub>(a), Fe<sub>3</sub>O<sub>4</sub>@SiO<sub>2</sub>@MAPS (b) and VBADB/MNPs (c).

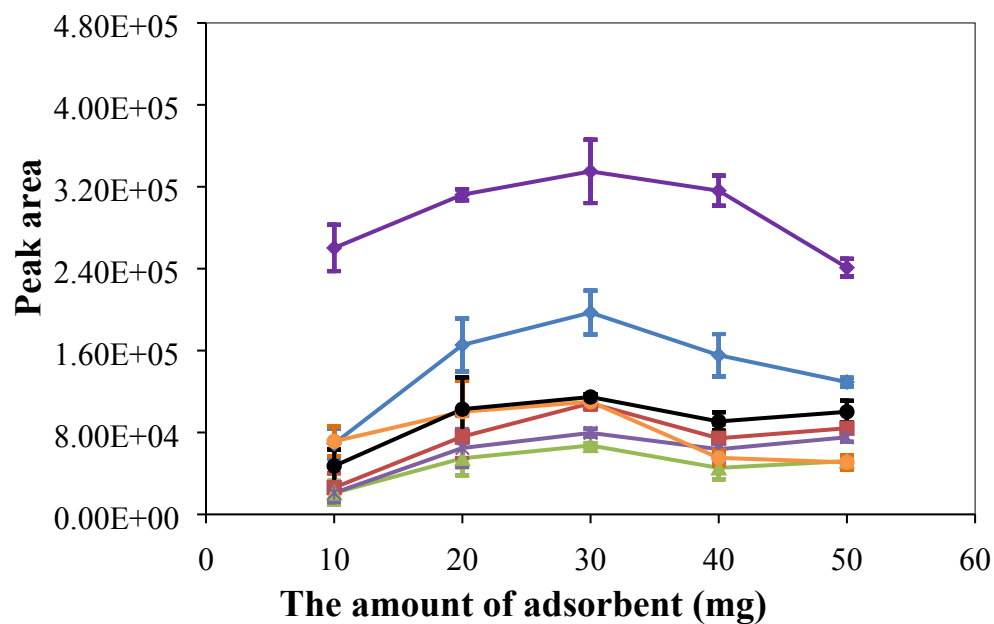

**Fig.S2.** The effect of the amount of adsorbent on extraction performance  
 Conditions: Using methanol as desorption solvent; the adsorption and desorption time were 15 min and 5 min, respectively; no salt was added in the sample and the pH values of sample matrix were not adjusted. The spiked concentration was 100 µg/L for each analyte.

Symbols: ⬆ LOM; ⬆ ENR; ⬆ SAR; ⬆ SPA. ⬆ MAR; ⬆ NOR; ⬆ CIP.
